# Supplementary material
Source: PubMed Central journal article supplement (PMC8922205)
Supplement: jamainternmed-e220134-s001.pdf [file jamainternmed-e220134-s001.pdf]

## Supplemental Online Content

Byrne P, Demasi M, Jones M, Smith SM, O'Brien KK, DuBroff R. Evaluating the association between low-density lipoprotein cholesterol reduction and relative and absolute effects of statin treatment: a systematic review and meta-analysis. *JAMA Intern Med*. Published online March 14, 2022. doi:10.1001/jamainternmed.2022.0134

**eFigure 1.** PRISMA Flow Diagram

**eFigure 2.** PICOTTS format

**eTable 1.** Included trials & references

**eTable 2.** Excluded trials & reasons for exclusion

**eFigure 3.** ROB of included trials for all outcomes

**eTable 3.** GRADE Table

**eFigure 4.** Meta-analysis of relative effects of treatment on all-cause mortality, all trials

**eFigure 5.** Meta-analysis of absolute effects of treatment on all-cause mortality, all trials

**eFigure 6.** Meta-analysis of relative effects of treatment on myocardial infarction, all trials

**eFigure 7.** Meta-analysis of absolute effects of treatment on myocardial infarction, all trials

**eFigure 8.** Meta-analysis of relative effects of treatment on stroke, all-trials

**eFigure 9.** Meta-analysis of absolute effects of treatment on stroke, all trials

**eFigure 10.** Meta-analysis of relative effects of treatment on all-cause mortality in primary and secondary prevention trials

**eFigure 11.** Meta-analysis of absolute effects of treatment on all-cause mortality in primary and secondary prevention trials

**eFigure 12.** Meta-analysis of relative effects of treatment on myocardial infarction in primary and secondary prevention trials

**eFigure 13.** Meta-analysis of absolute effects of treatment on myocardial infarction in primary and secondary prevention trials

**eFigure 14.** Meta-analysis of relative effects of treatment on stroke from primary and secondary prevention trials

**eFigure 15.** Meta-analysis of absolute effects of treatment on stroke from primary and secondary prevention trials

**eTable 4.** Meta-regression results of outcomes by mean difference in LDL-C (unadjusted)

This supplemental material has been provided by the authors to give readers additional information about their work.

Supplementary Figure e1 PRISMA Flow diagram

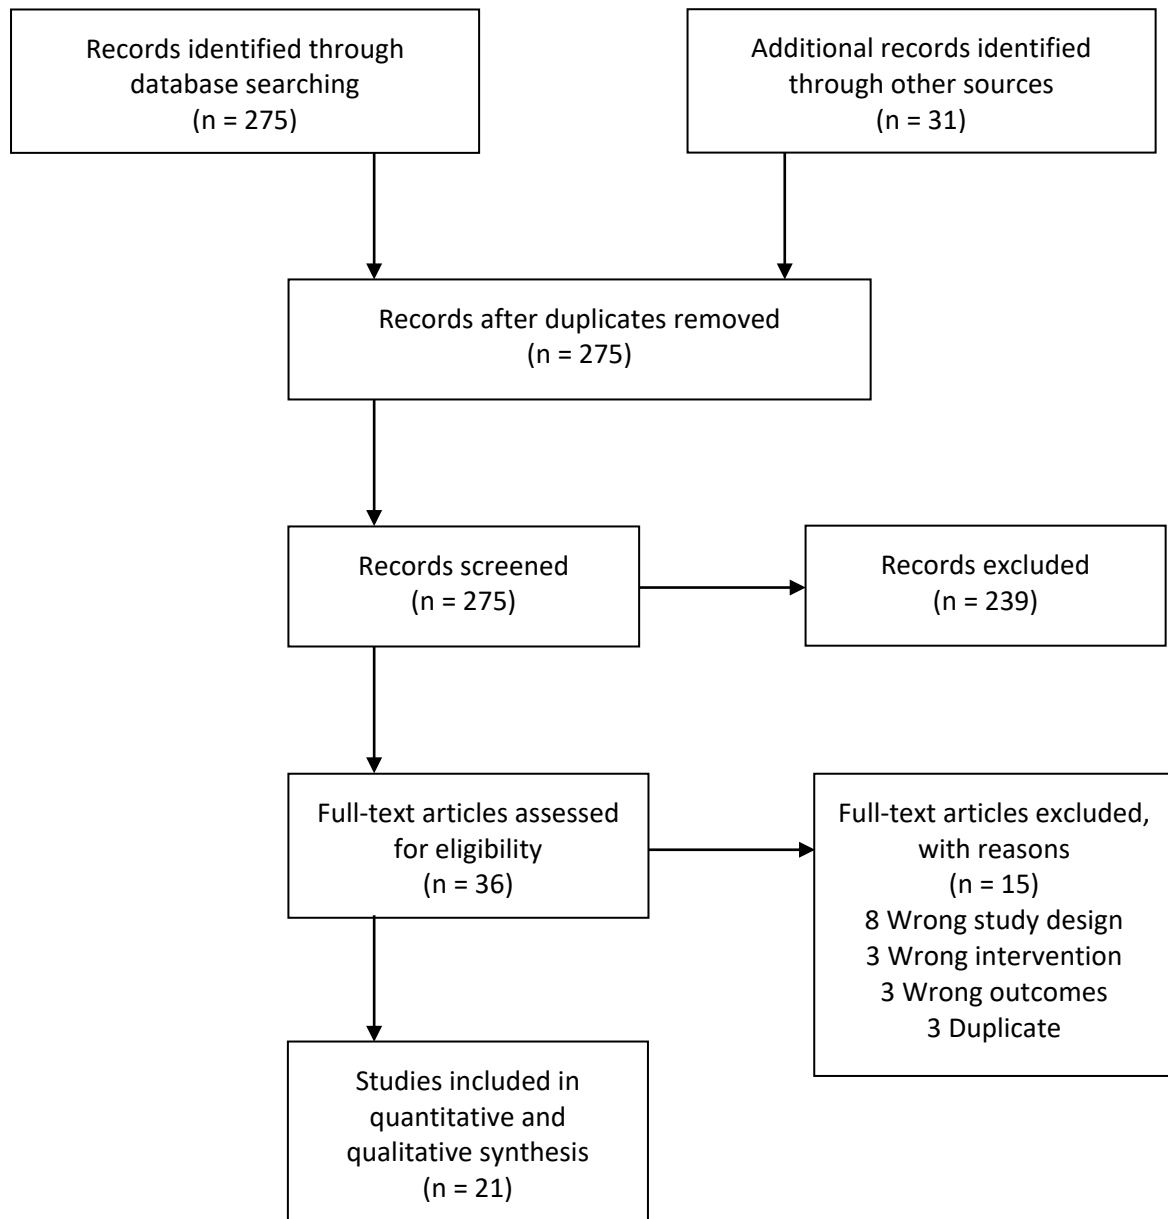

Supplementary Figure e2 PICOTTS (Patients, Interventions, Comparators, Outcomes, Timing, Setting and Study Design) Format

**Patients**

- Adults  $\geq 18$  years of age

**Interventions**

- Statins (HMG-CoA reductase inhibitors)

**Comparators**

- Placebo
- No treatment
- Usual care

**Primary outcomes**

- All-cause mortality

**Secondary outcomes**

- Myocardial infarction (MI)
- Stroke

**Timing**

- Studies whose intended duration is greater than two years

**Setting and Study Design**

- Systematic reviews of randomised controlled trials
- Systematic reviews of individual patient data

**Table e1: Included trials & references**

| Trial Year          | Duration of follow-up (years)* | Treatment               | Control    | Participants                             | Primary or secondary prevention | Primary endpoint                                                                                                                                    | Achieved LDL-C difference (mmol/L) |                     | Control group event rate (100 patient-years) |        |
|---------------------|--------------------------------|-------------------------|------------|------------------------------------------|---------------------------------|-----------------------------------------------------------------------------------------------------------------------------------------------------|------------------------------------|---------------------|----------------------------------------------|--------|
|                     |                                |                         |            |                                          |                                 |                                                                                                                                                     |                                    | All cause mortality | MI                                           | Stroke |
| 4S 1994             | 5.4                            | Simvastatin 10-40 mg/d  | Placebo    | 4,444 angina or s/p MI                   | Secondary                       | All cause mortality                                                                                                                                 | 1.75                               | 2.13                | 4.4                                          | 0.53   |
| WOSCOPS 1995        | 4.9                            | Pravastatin 40 mg/d     | Placebo    | 6,595 men hypercholesterolemia           | Primary                         | CHD death or nonfatal MI                                                                                                                            | 0.98                               | 0.84                | 1.83                                         | 0.32   |
| CARE 1996           | 5                              | Pravastatin 40 mg/d     | Placebo    | 4,159 s/p MI                             | Secondary                       | CHD death or nonfatal MI                                                                                                                            | 0.96                               | 1.89                | 2.59                                         | 0.75   |
| LIPID 1998          | 6.1                            | Pravastatin 40 mg/d     | Placebo    | 9,014 history CHD                        | Secondary                       | CHD death                                                                                                                                           | 0.97                               | 2.3                 | 1.69                                         | 0.74   |
| AFCAPS/TexCAPS 1998 | 5.2**                          | Lovastatin 20-40 mg/d   | Placebo    | 6,605 average cholesterol                | Primary                         | First acute coronary event                                                                                                                          | 1.08                               | NR                  | 0.55                                         | 1.49   |
| LIPS 2002           | 3.9                            | Fluvastatin 80 mg/d     | Placebo    | 1,677 s/p PCI                            | Secondary                       | Cardiac death, nonfatal MI or reintervention procedure                                                                                              | 1.08                               | 1.51                | NR                                           | NR     |
| HPS 2002            | 5                              | Simvastatin 40 mg/d     | Placebo    | 20,536 high risk                         | Both                            | All cause mortality                                                                                                                                 | 1                                  | 2.94                | 2.36                                         | 1.14   |
| PROSPER 2002        | 3.2                            | Pravastatin 40 mg/d     | Placebo    | 5,804 elderly                            | Both                            | CHD death, nonfatal MI or any stroke                                                                                                                | 1.03                               | 6.79                | 7.9                                          | 3      |
| ALLHAT-LLT 2002     | 4.8                            | Pravastatin 40 mg/d     | Usual care | 10,355 moderate hypercholesterolemia HBP | Primary                         | All cause mortality                                                                                                                                 | 0.44                               | 2.58                | 1.69                                         | 0.93   |
| ASCOT-LLA 2003      | 3.3**                          | Atorvastatin 10 mg/d    | Placebo    | 10,305 HBP average cholesterol           | Primary                         | CHD death or nonfatal MI                                                                                                                            | 1.2                                | 1.28                | 0.94                                         | 0.74   |
| ALERT 2003          | 5.1                            | Fluvastatin 40 mg/d     | Placebo    | 2,104 renal transplant recipients        | Both                            | Cardiac death, nonfatal MI or coronary intervention procedure                                                                                       | 1                                  | 2.57                | 1.96                                         | 1.17   |
| CARDS 2004          | 3.9**                          | Atorvastatin 10 mg/d    | Placebo    | 2,838 T2DM                               | Primary                         | Acute coronary event, coronary revascularization or stroke                                                                                          | 1.2                                | 1.49                | 1.11                                         | 0.71   |
| 4D 2005             | 4                              | Atorvastatin 10-20 mg/d | Placebo    | 1,255 T2DM haemodialysis                 | Both                            | Cardiac death, nonfatal MI or stroke                                                                                                                | 1.08                               | 12.58               | 4.4                                          | 2.32   |
| ASPEN 2006          | 4                              | Atorvastatin 10 mg/d    | placebo    | 2,410 T2DM                               | Both                            |                                                                                                                                                     | 0.79                               | 1.43                | 1.38                                         | 0.79   |
| MEGA 2006           | 5.3                            | Pravastatin 10-20 mg/d  | Usual care | 7,832 hypercholesterolemic               | Primary                         | CV death, nonfatal MI, nonfatal stroke, recanalization, CABG, resuscitated cardiac arrest or angina requiring hospitalization                       | 0.61                               | 0.38                | 0.16                                         | 0.29   |
| SPARCL 2006         | 4.9                            | Atorvastatin 80 mg/d    | Placebo    | 4,731 s/p stroke or TIA                  | Secondary                       | Fatal or nonfatal stroke                                                                                                                            | 1.4                                | 1.82                | 1.04                                         | 2.68   |
| CORONA 2007         | 2.7                            | Rosuvastatin 10 mg/d    | Placebo    | 5,011 systolic HF                        | Secondary                       | CV death, nonfatal MI or nonfatal stroke                                                                                                            | 1.56                               | 11.26               | 2.28                                         | 2.05   |
| JUPITER 2008        | 1.9**                          | Rosuvastatin 20 mg/d    | Placebo    | 17,802 elevated hs CRP                   | Primary                         | CV death, MI, stroke, arterial revascularization angina requiring hospitalization                                                                   | 1.43                               | 1.46                | 0.4                                          | 0.38   |
| GISSI-HF 2008       | 3.9                            | Rosuvastatin 10 mg/d    | Placebo    | 4,574 chronic heart failure              | Both                            | All cause mortality                                                                                                                                 | 0.75                               | 7.21                | 0.78                                         | 0.74   |
| AURORA 2009         | 3.8                            | Rosuvastatin 10 mg/d    | Placebo    | 2,776 hemodialysis                       | Both                            | CV death, nonfatal MI or nonfatal stroke                                                                                                            | 0.73                               | 12.55               | 6.01                                         | 1.54   |
| HOPE-3 2016         | 5.6                            | Rosuvastatin 10 mg/d    | Placebo    | 12,705 intermediate risk                 | Primary                         | CV death, nonfatal MI or nonfatal stroke or CV death, nonfatal MI, nonfatal stroke, revascularization, heart failure or resuscitated cardiac arrest | 0.89                               | 1                   | 0.19                                         | 0.28   |

Note: All included trials were commercially funded by pharmaceutical companies.

\*mean or median

\*\* premature termination

eREFERENCES

- Randomised trial of cholesterol lowering in 4444 patients with coronary heart disease: the Scandinavian Simvastatin Survival Study (4S). *Lancet*. 1994 Nov 19;344(8934):1383-9.
- Shepherd J, Cobbe SM, Ford I, et al. Prevention of coronary heart disease with pravastatin in men with hypercholesterolemia. West of Scotland Coronary Prevention Study Group. *N Engl J Med*. 1995 Nov 16;333(20):1301-7. doi: 10.1056/NEJM199511163332001.
- Sacks FM, Pfeffer MA, Moye LA, et al. The effect of pravastatin on coronary events after myocardial infarction in patients with average cholesterol levels. Cholesterol and Recurrent Events Trial investigators. *N Engl J Med*. 1996 Oct 3;335(14):1001-9. doi: 10.1056/NEJM199610033351401.

- d. Long-Term Intervention with Pravastatin in Ischaemic Disease (LIPID) Study Group. Prevention of cardiovascular events and death with pravastatin in patients with coronary heart disease and a broad range of initial cholesterol levels. *N Engl J Med.* 1998 Nov 5;339(19):1349-57. doi: 10.1056/NEJM199811053391902.
- e. Downs JR, Clearfield M, Weis S, et al. Primary prevention of acute coronary events with lovastatin in men and women with average cholesterol levels: results of AFCAPS/TexCAPS. Air Force/Texas Coronary Atherosclerosis Prevention Study. *JAMA.* 1998 May 27;279(20):1615-22. doi: 10.1001/jama.279.20.1615.
- f. Serruys PW, de Feyter P, Macaya C, et al; Lescol Intervention Prevention Study (LIPS) Investigators. Fluvastatin for prevention of cardiac events following successful first percutaneous coronary intervention: a randomized controlled trial. *JAMA.* 2002 Jun 26;287(24):3215-22. doi: 10.1001/jama.287.24.3215.
- g. Heart Protection Study Collaborative Group. MRC/BHF Heart Protection Study of cholesterol lowering with simvastatin in 20,536 high-risk individuals: a randomised placebo-controlled trial. *Lancet.* 2002 Jul 6;360(9326):7-22. doi: 10.1016/S0140-6736(02)09327-3.
- h. Shepherd J, Blauw GJ, Murphy MB, et al; PROSPER study group. PROspective Study of Pravastatin in the Elderly at Risk. Pravastatin in elderly individuals at risk of vascular disease (PROSPER): a randomised controlled trial. *Lancet.* 2002 Nov 23;360(9346):1623-30. doi: 10.1016/s0140-6736(02)11600-x.
- i. The ALLHAT Officers and Coordinators for the ALLHAT Collaborative Research Group. Major Outcomes in Moderately Hypercholesterolemic, Hypertensive Patients Randomized to Pravastatin vs Usual Care: The Antihypertensive and Lipid-Lowering Treatment to Prevent Heart Attack Trial (ALLHAT-LLT). *JAMA.* 2002;288(23):2998–3007. doi:10.1001/jama.288.23.2998
- j. Sever PS, Dahlöf B, Poulter NR, et al; ASCOT investigators. Prevention of coronary and stroke events with atorvastatin in hypertensive patients who have average or lower-than-average cholesterol concentrations, in the Anglo-Scandinavian Cardiac Outcomes Trial—Lipid Lowering Arm (ASCOT-LLA): a multicentre randomised controlled trial. *Lancet.* 2003 Apr 5;361(9364):1149-58. doi: 10.1016/S0140-6736(03)12948-0.
- k. Holdaas H, Fellström B, Jardine AG, et al; Assessment of LEscol in Renal Transplantation (ALERT) Study Investigators. Effect of fluvastatin on cardiac outcomes in renal transplant recipients: a multicentre, randomised, placebo-controlled trial. *Lancet.* 2003 Jun 14;361(9374):2024-31. doi: 10.1016/S0140-6736(03)13638-0.
- l. Colhoun HM, Betteridge DJ, Durrington PN, et al; CARDS investigators. Primary prevention of cardiovascular disease with atorvastatin in type 2 diabetes in the Collaborative Atorvastatin Diabetes Study (CARDS): multicentre randomised placebo-controlled trial. *Lancet.* 2004 Aug 21-27;364(9435):685-96. doi: 10.1016/S0140-6736(04)16895-5.
- m. Wanner C, Krane V, März W, et al; German Diabetes and Dialysis Study Investigators. Atorvastatin in patients with type 2 diabetes mellitus undergoing hemodialysis. *N Engl J Med.* 2005 Jul 21;353(3):238-48. doi: 10.1056/NEJMoa043545. Erratum in: *N Engl J Med.* 2005 Oct 13;353(15):1640.
- n. Knopp RH, d'Emden M, Smilde JG, Pocock SJ. Efficacy and safety of atorvastatin in the prevention of cardiovascular end points in subjects with type 2 diabetes: the Atorvastatin Study for Prevention of Coronary Heart Disease Endpoints in non-insulin-dependent diabetes mellitus (ASPEN). *Diabetes Care.* 2006 Jul;29(7):1478-85. doi: 10.2337/dc05-2415.
- o. Nakamura H, Arakawa K, Itakura H, et al; MEGA Study Group. Primary prevention of cardiovascular disease with pravastatin in Japan (MEGA Study): a prospective randomised controlled trial. *Lancet.* 2006 Sep 30;368(9542):1155-63. doi: 10.1016/S0140-6736(06)69472-5.
- p. Amarenco P, Bogousslavsky J, Callahan A 3rd, et al; Stroke Prevention by Aggressive Reduction in Cholesterol Levels (SPARCL) Investigators. High-dose atorvastatin after stroke or transient ischemic attack. *N Engl J Med.* 2006 Aug 10;355(6):549-59. doi: 10.1056/NEJMoa061894. Erratum in: *N Engl J Med.* 2018 Jun 13;null.
- q. Cheng VC, Lau SK, Woo PC, Yuen KY. Severe acute respiratory syndrome coronavirus as an agent of emerging and reemerging infection. *Clin Microbiol Rev.* 2007;20(4):660-694. doi:10.1128/CMR.00023-07
- r. Ridker PM, Danielson E, Fonseca FA, et al; JUPITER Study Group. Rosuvastatin to prevent vascular events in men and women with elevated C-reactive protein. *N Engl J Med.* 2008 Nov 20;359(21):2195-207. doi: 10.1056/NEJMoa0807646.
- s. Tavazzi L, Maggioni AP, Marchioli R, et al; Gissi-HF Investigators. Effect of rosuvastatin in patients with chronic heart failure (the GISSI-HF trial): a randomised, double-blind, placebo-controlled trial. *Lancet.* 2008 Oct 4;372(9645):1231-9. doi: 10.1016/S0140-6736(08)61240-4.
- t. Fellström BC, Jardine AG, Schmieder RE, et al; AURORA Study Group. Rosuvastatin and cardiovascular events in patients undergoing hemodialysis. *N Engl J Med.* 2009 Apr 2;360(14):1395-407. doi: 10.1056/NEJMoa0810177. Epub 2009 Mar 30. Erratum in: *N Engl J Med.* 2010 Apr 15;362(15):1450.
- u. Yusuf S, Bosch J, Dagenais G, et al; HOPE-3 Investigators. Cholesterol Lowering in Intermediate-Risk Persons without Cardiovascular Disease. *N Engl J Med.* 2016 May 26;374(21):2021-31. doi: 10.1056/NEJMoa1600176.

Table e2: Excluded trials &amp; reasons for exclusion

| Short title                               | Title                                                                                                                                                                                                                              | Author                                                                                                                                                                              | Year of publication | Journal                                       | DOI                                                                                       | Exclusion reason   |
|-------------------------------------------|------------------------------------------------------------------------------------------------------------------------------------------------------------------------------------------------------------------------------------|-------------------------------------------------------------------------------------------------------------------------------------------------------------------------------------|---------------------|-----------------------------------------------|-------------------------------------------------------------------------------------------|--------------------|
| GISSI-P <sup>a</sup>                      | Dietary supplementation with n-3 polyunsaturated fatty acids vitamin E after myocardial infarction: results of the GISSI-Prevenzione trial                                                                                         | Gruppo Italiano per lo Studio della Sopravvivenza nell'Infarto miocardico,                                                                                                          | 1999                | The Lancet                                    | <a href="https://doi.org/10.1016/S0140-6736(99)07072-5">10.1016/S0140-6736(99)07072-5</a> | Wrong study design |
| WOSCOPS <sup>b</sup> (follow-up analysis) | Low-Density Lipoprotein Cholesterol Lowering for the Primary Prevention of Cardiovascular Disease Among Men With Primary Elevations of Low-Density Lipoprotein Cholesterol Levels of 190 mg/dL or Above: Analyses From the WOSCOPS | Vallejo-Vaz AJ; Robertson M; Catapano AL; Watts GF; Kastelein JJ; Packard CJ; Ford I; Ray KK                                                                                        | 2017                | Circulation                                   | 10.1161/CIRCULATIONAHA.117.027966                                                         | Wrong study design |
| ALLIANCE <sup>c</sup>                     | Clinical outcomes in managed-care patients with coronary heart disease treated aggressively in lipid-lowering disease management clinics: the alliance study.                                                                      | Koren MJ; Hunninghake DB                                                                                                                                                            | 2004                | J Am Coll Cardiol                             | 10.1016/j.jacc.2004.07.053                                                                | Wrong study design |
| TNT <sup>d</sup>                          | Intensive lipid lowering with atorvastatin in patients with coronary heart disease and chronic kidney disease: the TNT (Treating to New Targets) study                                                                             | Shepherd, James; Kastelein, John JP; Bittner, Vera; Deedwania, Prakash; Breazna, Andrei; Dobson, Stephen; Wilson, Daniel J; Zuckerman, Andrea; Wenger, Nanette K; TNT Investigators | 2008                | Journal of the American College of Cardiology | 10.1016/j.jacc.2007.11.072                                                                | Wrong study design |
| Na                                        | The effect of fluvastatin on cardiac events in patients with symptomatic coronary artery disease during one year of treatment.                                                                                                     | Riegger G; Abletshauser C; Ludwig M; Schwandt P; Widimsky J; Weidinger G; Welzel D                                                                                                  | 1999 <sup>e</sup>   | Atherosclerosis                               | 10.1016/s0021-9150(99)00062-3                                                             | Wrong study design |
| AFCAPS/Tex CAPS <sup>f</sup>              | Air Force/Texas Coronary Atherosclerosis Prevention Study (AFCAPS/TEXCAPS)                                                                                                                                                         | Downs JR; Clearfield M; Tyroler HA; Whitney                                                                                                                                         | 2001                | Am J Cardiol                                  | 10.1016/s0002-9149(01)01464-3                                                             | Wrong study design |

|                     |                                                                                                                                                                                  |                                                                                                                      |                   |                           |                                                                                         |                    |
|---------------------|----------------------------------------------------------------------------------------------------------------------------------------------------------------------------------|----------------------------------------------------------------------------------------------------------------------|-------------------|---------------------------|-----------------------------------------------------------------------------------------|--------------------|
|                     | ) : additional perspectives on tolerability of long-term treatment with lovastatin.                                                                                              | EJ; Kruyer W; Langendorfer A; Zagrebelsky V; Weis S; Shapiro DR; Beere PA; Gotto AM                                  |                   |                           |                                                                                         |                    |
| SEARCH <sup>e</sup> | Study of the effectiveness of additional reductions in cholesterol and homocysteine (SEARCH): characteristics of a randomized trial among 12 064 myocardial infarction survivors | SEARCH Study Collaborative Group,                                                                                    | 2007              | American Heart Journal    | <a href="https://doi.org/10.1016/j.ahj.2007.06.034">10.1016/j.ahj.2007.06.034</a>       | Wrong intervention |
| MARS <sup>b</sup>   | The Monitored Atherosclerosis Regression Study (MARS). Design, methods and baseline results.                                                                                     | Cashin-Hemphill L; Kramsch DM; Azen SP; DeMets D; DeBoer LW; Hwang I; Vailas L; Hirsch LJ; Mack WJ; DeBoer L; et al. | 1992              | Online J Curr Clin Trials | na                                                                                      | Wrong outcomes     |
| TECOS <sup>i</sup>  | Low-density lipoprotein cholesterol treatment and outcomes in patients with type 2 diabetes and established cardiovascular disease: Insights from TECOS.                         | De Ferrari GM; Stevens SR; Ambrosio G; Leonardi S; Armstrong PW; Green JB; Wamil M; Holman RR; Peterson ED           | 2020              | Am Heart J                | <a href="https://doi.org/10.1016/j.ahj.2019.11.005">10.1016/j.ahj.2019.11.005</a>       | Wrong intervention |
| na                  | Efficacy and safety of cerivastatin 0.8 mg in patients with hypercholesterolemia: the pivotal placebo-controlled clinical trial. Cerivastatin Study Group.                       | Insull W Jr; Isaacsohn J; Kwiterovich P; Ra P; Brazg R; Dujovne C; Shan M; Shugrue-Crowley E; Ripa S; Tota R         | 2000 <sup>j</sup> | J Int Med Res             | <a href="https://doi.org/10.1177/147323000002800201">10.1177/147323000002800201</a>     | Wrong outcomes     |
| CHORUS <sup>k</sup> | The CHORUS (Cerivastatin in Heart Outcomes in Renal Disease: Understanding Survival) protocol: a double-blind, placebo-controlled trial in patients with esrd.                   | Keane WF; Brenner BM; Mazzu A; Agro A                                                                                | 2001              | Am J Kidney Dis           | <a href="https://doi.org/10.1053/ajkd.2001.20739">10.1053/ajkd.2001.20739</a>           | Wrong study design |
| na                  | Efficacy and safety of pravastatin in the long-term treatment of elderly patients with hypercholesterolemia.                                                                     | Santinga JT; Rosman HS; Rubenfire M; Maciejko JJ; Kobylyak                                                           | 1994 <sup>l</sup> | Am J Med                  | <a href="https://doi.org/10.1016/0002-9343(94)90090-6">10.1016/0002-9343(94)90090-6</a> | Wrong outcomes     |

|                         |                                                                                                                                                                           |                                                                                   |                   |                                               |                                                                                     |                    |
|-------------------------|---------------------------------------------------------------------------------------------------------------------------------------------------------------------------|-----------------------------------------------------------------------------------|-------------------|-----------------------------------------------|-------------------------------------------------------------------------------------|--------------------|
|                         |                                                                                                                                                                           | L;<br>McGovern<br>ME;<br>Behounek<br>BD                                           |                   |                                               |                                                                                     |                    |
| St Francis <sup>m</sup> | Treatment of asymptomatic adults with elevated coronary calcium scores with atorvastatin, vitamin C, and vitamin E: the St. Francis Heart Study randomized clinical trial | Arad, Yadon; Spadaro, Louise A; Roth, Marguerite; Newstein, David; Guerci, Alan D | 2005              | Journal of the American College of Cardiology | <a href="https://doi.org/10.1016/j.jacc.2005.02.089">10.1016/j.jacc.2005.02.089</a> | Wrong intervention |
| na                      | Pitavastatin demonstrates long-term efficacy, safety and tolerability in elderly patients with primary hypercholesterolaemia or combined (mixed) dyslipidaemia.           | Stender S; Budinski D; Hounslow N                                                 | 2013 <sup>n</sup> | Eur J Prev Cardiol                            | 10.1177/2047487312437326                                                            | Wrong study design |

na – not available

#### REFERENCES

- a. Hopper L, Ness A, Higgins JP, et al. GISSI-Prevenzione trial. *Lancet*. 1999 Oct 30;354(9189):1557. doi: 10.1016/s0140-6736(05)76587-9.
- b. Kashef MA, Giugliano G. Legacy effect of statins: 20-year follow up of the West of Scotland Coronary Prevention Study (WOSCOPS). *Glob Cardiol Sci Pract*. 2016;2016(4):e201635. Published 2016 Dec 30. doi:10.21542/gcsp.2016.35
- c. Koren MJ, Hunninghake DB; ALLIANCE Investigators. Clinical outcomes in managed-care patients with coronary heart disease treated aggressively in lipid-lowering disease management clinics: the alliance study. *J Am Coll Cardiol*. 2004 Nov 2;44(9):1772-9. doi: 10.1016/j.jacc.2004.07.053.
- d. Shepherd J, Kastelein JJ, Bittner V, et al; TNT (Treating to New Targets) Investigators. Intensive lipid lowering with atorvastatin in patients with coronary heart disease and chronic kidney disease: the TNT (Treating to New Targets) study. *J Am Coll Cardiol*. 2008 Apr 15;51(15):1448-54. doi: 10.1016/j.jacc.2007.11.072.
- e. Riegger G, Abletshauser C, Ludwig M, et al. The effect of fluvastatin on cardiac events in patients with symptomatic coronary artery disease during one year of treatment. *Atherosclerosis*. 1999 May;144(1):263-70. doi: 10.1016/s0021-9150(99)00062-3.
- f. Downs JR, Clearfield M, Tyroler HA, et al. Air Force/Texas Coronary Atherosclerosis Prevention Study (AFCAPS/TEXCAPS): additional perspectives on tolerability of long-term treatment with lovastatin. *Am J Cardiol*. 2001 May 1;87(9):1074-9. doi: 10.1016/s0002-9149(01)01464-3.
- g. SEARCH Study Collaborative Group, Bowman L, Armitage J, Bulbulia R, Parish S, Collins R. Study of the effectiveness of additional reductions in cholesterol and homocysteine (SEARCH): characteristics of a randomized trial among 12064 myocardial infarction survivors. *Am Heart J*. 2007 Nov;154(5):815-23. doi: 10.1016/j.ahj.2007.06.034. Epub 2007 Sep 6.
- h. Cashin-Hemphill L, Kramsch DM, Azen SP, et al. The Monitored Atherosclerosis Regression Study (MARS). Design, methods and baseline results. *Online J Curr Clin Trials*. 1992 Oct 23;Doc No 26:[9897 words; 83 paragraphs]. Erratum in: *Online J Curr Clin Trials* 1992 Nov 14;Doc No 29.
- i. De Ferrari GM, Stevens SR, Ambrosio G, et al. Low-density lipoprotein cholesterol treatment and outcomes in patients with type 2 diabetes and established cardiovascular disease: Insights from TECOS. *American Heart Journal*. 2020 Feb;220:82-88. DOI: 10.1016/j.ahj.2019.11.005. PMID: 31790905.
- j. Insull W Jr, Isaacsohn J, Kwiterovich P, et al. Efficacy and safety of cerivastatin 0.8 mg in patients with hypercholesterolaemia: the pivotal placebo-controlled clinical trial. *Cerivastatin Study Group. J Int Med Res*. 2000 Mar-Apr;28(2):47-68. doi: 10.1177/147323000002800201.
- k. Keane WF, Brenner BM, Mazzu A, Agro A. The CHORUS (Cerivastatin in Heart Outcomes in Renal Disease: Understanding Survival) protocol: a double-blind, placebo-controlled trial in patients with esrd. *Am J Kidney Dis*. 2001 Jan;37(1 Suppl 2):S48-53. doi: 10.1053/ajkd.2001.20739.
- l. Santinga JT, Rosman HS, Rubenfire M, et al. Efficacy and safety of pravastatin in the long-term treatment of elderly patients with hypercholesterolemia. *Am J Med*. 1994 Jun;96(6):509-15. doi: 10.1016/0002-9343(94)90090-6.
- m. Arad Y, Spadaro LA, Roth M, et al. Treatment of asymptomatic adults with elevated coronary calcium scores with atorvastatin, vitamin C, and vitamin E: the St. Francis Heart Study randomized clinical trial. *J Am Coll Cardiol*. 2005 Jul 5;46(1):166-72. doi: 10.1016/j.jacc.2005.02.089. Erratum in: *J Am Coll Cardiol*. 2011 Oct 18;58(17):1832.
- n. Stender S, Budinski D, Hounslow N. Pitavastatin demonstrates long-term efficacy, safety and tolerability in elderly patients with primary hypercholesterolaemia or combined (mixed) dyslipidaemia. *Eur J Prev Cardiol*. 2013 Feb;20(1):29-39. doi: 10.1177/2047487312437326.



Supplementary Figure e3 - Risk of bias of included studies for all outcomes

| Study ID | Trial ID  | Outcome                    | D1 | D2 | D3 | D4 | D5 | Overall |
|----------|-----------|----------------------------|----|----|----|----|----|---------|
| 1        | 4D        | All cause mortality        | +  | +  | +  | +  | +  | +       |
| 1        | 4D        | Cardiac mortality          | +  | +  | +  | +  | +  | +       |
| 1        | 4D        | Non-fatal MI               | +  | +  | +  | +  | +  | +       |
| 1        | 4D        | Fatal Stroke               | +  | +  | +  | +  | !  | !       |
| 2        | CARDS     | All cause mortality        | +  | !  | +  | +  | +  | !       |
| 2        | CARDS     | Stroke                     | +  | !  | +  | +  | +  | !       |
| 3        | WOSCOPS   | All cause mortality        | +  | +  | +  | +  | +  | +       |
| 3        | WOSCOPS   | Death from all CV causes   | +  | +  | +  | +  | +  | +       |
| 3        | WOSCOPS   | Definate non-fatal MI      | +  | +  | +  | +  | +  | +       |
| 3        | WOSCOPS   | Fatal or non fatal stroke  | +  | +  | +  | +  | +  | +       |
| 4        | GISS-HF   | All cause mortality        | +  | +  | +  | +  | +  | +       |
| 4        | GISS-HF   | Cardiac mortality          | +  | +  | +  | +  | +  | +       |
| 4        | GISS-HF   | Fatal and non-fatal MI     | +  | +  | +  | +  | +  | +       |
| 4        | GISS-HF   | Fatal and non-fatal stroke | +  | +  | +  | +  | +  | +       |
| 5        | ASCOT-LL  | All Cause mortality        | +  | !  | +  | +  | +  | !       |
| 5        | ASCOT-LL  | CV mortality               | +  | !  | +  | +  | +  | !       |
| 5        | ASCOT-LL  | Fatal and non fatal stroke | +  | !  | +  | +  | +  | !       |
| 6        | ASPEN     | All cause mortality        | +  | +  | +  | +  | !  | !       |
| 6        | ASPEN     | CV mortality               | +  | +  | +  | +  | !  | !       |
| 6        | ASPEN     | Fatal and non-fatal MI     | +  | +  | +  | +  | !  | !       |
| 6        | ASPEN     | fatal and non-fatal stroke | +  | +  | +  | +  | !  | !       |
| 7        | LIPID     | All cause mortality        | +  | +  | +  | +  | +  | +       |
| 7        | LIPID     | CVD mortality              | +  | +  | +  | +  | +  | +       |
| 7        | LIPID     | Any MI                     | +  | +  | +  | +  | +  | +       |
| 7        | LIPID     | Any stroke                 | +  | +  | +  | +  | +  | +       |
| 8        | JUPITER   | All cause mortality        | +  | !  | +  | +  | +  | !       |
| 8        | JUPITER   | Any MI                     | +  | !  | +  | +  | +  | !       |
| 8        | JUPITER   | Any stroke                 | +  | !  | +  | +  | +  | !       |
| 9        | AFCAPS/T  | Fatal CV events            | +  | !  | +  | +  | +  | !       |
| 9        | AFCAPS/T  | Fatal and non-fatal MI     | +  | !  | +  | +  | +  | !       |
| 10       | CARE      | Death from CHD             | +  | +  | +  | +  | +  | +       |
| 10       | CARE      | Fatal MI                   | +  | +  | +  | +  | +  | +       |
| 11       | ALERT     | All cause Mortality        | +  | +  | +  | +  | +  | +       |
| 11       | ALERT     | Cardiac mortality          | +  | +  | +  | +  | +  | !       |
| 11       | ALERT     | Definate non-fatal MI      | +  | +  | +  | +  | +  | +       |
| 12       | MEGA      | All cause mortality        | +  | +  | +  | +  | +  | +       |
| 12       | MEGA      | CVD death                  | +  | +  | +  | +  | +  | +       |
| 12       | MEGA      | MI                         | +  | +  | +  | +  | +  | +       |
| 12       | MEGA      | Stroke                     | +  | +  | +  | +  | +  | +       |
| 13       | LIPS      | All cause mortality        | +  | +  | +  | +  | +  | +       |
| 13       | LIPS      | Cardiac mortality          | +  | +  | +  | +  | +  | +       |
| 14       | AURORA    | All cause mortality        | +  | +  | +  | +  | +  | +       |
| 14       | AURORA    | CV mortality               | +  | +  | +  | +  | +  | +       |
| 14       | AURORA    | Non-fatal MI               | +  | +  | +  | +  | +  | +       |
| 14       | AURORA    | Non-fatal stroke           | +  | +  | +  | +  | +  | +       |
| 15       | ALLHAT-LI | All cause mortality        | +  | +  | +  | +  | +  | +       |
| 15       | ALLHAT-LI | CV mortality               | +  | +  | +  | +  | +  | +       |
| 15       | ALLHAT-LI | Any stroke                 | +  | +  | +  | +  | +  | +       |
| 16       | HPS       | All cause mortality        | +  | +  | +  | +  | +  | +       |
| 16       | HPS       | cardiovascular mortality   | +  | +  | +  | +  | +  | +       |
| 16       | HPS       | Non-fatal MI               | +  | +  | +  | +  | +  | +       |
| 16       | HPS       | Any stroke                 | +  | +  | +  | +  | +  | +       |
| 17       | SPARCL    | All cause mortality        | +  | +  | +  | +  | +  | +       |
| 17       | SPARCL    | Cardiovascular mortality   | +  | +  | +  | +  | +  | +       |
| 17       | SPARCL    | Non-fatal MI               | +  | +  | +  | +  | +  | +       |
| 17       | SPARCL    | Any stroke                 | +  | +  | +  | +  | +  | +       |
| 18       | 4S        | All cause mortality        | +  | +  | +  | +  | +  | +       |
| 18       | 4S        | Cardiovascular mortality   | +  | +  | +  | +  | +  | +       |
| 18       | 4S        | Any major coronary event   | +  | +  | +  | +  | +  | +       |
| 19       | CORONA    | All cause mortality        | +  | +  | +  | +  | +  | +       |
| 19       | CORONA    | Cardiovascular mortality   | +  | +  | +  | +  | +  | +       |
| 19       | CORONA    | Non-Fatal MI               | +  | +  | +  | +  | +  | +       |
| 19       | CORONA    | Any stroke                 | +  | +  | +  | +  | +  | +       |
| 20       | HOPE      | All cause mortality        | +  | +  | +  | +  | +  | +       |
| 20       | HOPE      | Cardiovascular mortality   | +  | +  | +  | +  | +  | +       |
| 20       | HOPE      | Non-fatal MI               | +  | +  | +  | +  | +  | +       |
| 20       | HOPE      | Any stroke                 | +  | +  | +  | +  | +  | +       |
| 21       | PROSPER   | Non-fatal MI               | +  | +  | +  | +  | +  | +       |
| 21       | PROSPER   | Any stroke                 | +  | +  | +  | +  | +  | +       |

-  Low risk
-  Some concerns
-  High risk

- D1 Randomisation process
- D2 Deviations from the intended intervention:
- D3 Missing outcome data
- D4 Measurement of the outcome
- D5 Selection of the reported result

Note: All trials were funded partly or wholly by the pharmaceutical industry.

Table e3: GRADE Table

| Certainty assessment                                       |                   |                      |                      |              |                      |                      | N <sup>o</sup> of patients         |                       | Effect                 | Certainty             | Importance |
|------------------------------------------------------------|-------------------|----------------------|----------------------|--------------|----------------------|----------------------|------------------------------------|-----------------------|------------------------|-----------------------|------------|
| N <sup>o</sup> of studies                                  | Study design      | Risk of bias         | Inconsistency        | Indirectness | Imprecision          | Other considerations | statin induced reductions in LDL-C | placebo or usual care | Relative (95% CI)      |                       |            |
| <b>All cause mortality - primary prevention trials</b>     |                   |                      |                      |              |                      |                      |                                    |                       |                        |                       |            |
| 6                                                          | randomised trials | serious <sup>a</sup> | not serious          | not serious  | serious <sup>b</sup> | none                 | 29,028                             | 29,099                | RR 0.87 (0.78 to 0.97) | ⊕⊕⊕○<br>Moderate      | CRITICAL   |
| <b>All cause mortality - secondary prevention trials</b>   |                   |                      |                      |              |                      |                      |                                    |                       |                        |                       |            |
| 5                                                          | randomised trials | not serious          | serious <sup>c</sup> | not serious  | serious <sup>d</sup> | none                 | 12,227                             | 12,209                | RR 0.86 (0.73 to 1.02) | ⊕⊕○○<br>Low           | CRITICAL   |
| <b>All cause mortality -All trials</b>                     |                   |                      |                      |              |                      |                      |                                    |                       |                        |                       |            |
| 19                                                         | randomised trials | serious <sup>e</sup> | serious <sup>f</sup> | not serious  | serious <sup>g</sup> | none                 | 56,331                             | 56,375                | RR 0.91 (0.86 to 0.95) | ⊕⊕⊕○<br>Low/Moderate  | CRITICAL   |
| <b>Myocardial Infarction - primary prevention trials</b>   |                   |                      |                      |              |                      |                      |                                    |                       |                        |                       |            |
| 6                                                          | randomised trials | serious <sup>h</sup> | not serious          | not serious  | not serious          | none                 | 27,162                             | 27,215                | RR 0.62 (0.54 to 0.71) | ⊕⊕⊕⊕<br>Moderate/High | CRITICAL   |
| <b>Myocardial Infarction - secondary prevention trials</b> |                   |                      |                      |              |                      |                      |                                    |                       |                        |                       |            |
| 5                                                          | randomised trials | not serious          | not serious          | not serious  | not serious          | none                 | 13,464                             | 13,457                | RR 0.73 (0.65 to 0.82) | ⊕⊕⊕⊕<br>High          | CRITICAL   |
| <b>Myocardial infarction - All trials</b>                  |                   |                      |                      |              |                      |                      |                                    |                       |                        |                       |            |
| 18                                                         | randomised trials | serious <sup>i</sup> | not serious          | not serious  | serious <sup>j</sup> | none                 | 31,989                             | 32,040                | RR 0.71 (0.66 to 0.78) | ⊕⊕⊕○<br>Moderate      | CRITICAL   |
| <b>Stroke - primary prevention trials</b>                  |                   |                      |                      |              |                      |                      |                                    |                       |                        |                       |            |
| 6                                                          | randomised trials | serious <sup>k</sup> | serious <sup>l</sup> | not serious  | serious <sup>m</sup> | none                 | 29,028                             | 29,099                | RR 0.76 (0.63 to 0.91) | ⊕⊕⊕○<br>Low/Moderate  | CRITICAL   |
| <b>Stroke - secondary prevention trials</b>                |                   |                      |                      |              |                      |                      |                                    |                       |                        |                       |            |
| 4                                                          | randomised trials | not serious          | serious <sup>n</sup> | not serious  | serious <sup>o</sup> | none                 | 11,383                             | 11,376                | RR 0.93 (0.80 to 1.08) | ⊕⊕⊕○<br>Low/Moderate  | CRITICAL   |
| <b>Stroke - All trials</b>                                 |                   |                      |                      |              |                      |                      |                                    |                       |                        |                       |            |
| 18                                                         | randomised trials | serious <sup>p</sup> | serious <sup>q</sup> | not serious  | serious <sup>r</sup> | none                 | 61,656                             | 61,594                | RR 0.86 (0.78 to 0.95) | ⊕⊕⊕○<br>Low/Moderate  | CRITICAL   |

CI: confidence interval; RR: risk ratio

Explanations

Note: We have marked some items down by 0.5 points when we considered that the issue was but not worthy of a 1-point reduction. This method is suggested by Dr Paul Glasziou (Pers. Comm. Glasziou, P.)

- a. Marked down by 0.5 points as 2 out of 6 trials were stopped early (CARDS and JUPITER)
- b. Marked down by 0.5 points. For 5 out of 6 trials the CIs cross 1 (more than half the trials), however for the pooled estimate the CI does not cross 1.
- c. Marked down by 1 point because estimates range from 0.71 to 1.02 and the I squared value is 81.75%
- d. Marked down by 1 point because for 3 out of 5 trials (more than half the trials) and for the pooled estimate the CIs crosses 1
- e. Marked down by 0.5 points as 3 out of 19 trials were stopped early (JUPITER, CARDS and ASCOT). There were some concerns with ROB2 for ASPEN trial.
- f. Marked down by 0.5 points as the point estimates range from 0.72 to 1.02. and the I squared value 51.96%
- g. Marked down by 0.5 points as in 15 out of 19 trials the CIs cross 1 (more than half the trials), however, for the pooled estimate the CI does not cross 1.
- h. Marked down by 0.5 points as 3 of the trials were stopped early (JUPITER, CARDS, AFCAPS/TexCAPS)
- i. Marked down by 0.5 points as 3 out of 18 trials were stopped early (JUPITER, CARDS and ASCOT). There were some concerns with ROB2 for ASPEN trial
- j. Marked down by 0.5 points as 8 out of 18 trials (almost half the trials) the CIs cross 1, however, the pooled estimate CI is quite tight and does not cross 1.
- k. Marked down by 0.5 points as 2 of the 6 trials were stopped early
- l. Marked down by 0.5 points as the point estimates range from 0.52 to 0.91, however, I<sup>2</sup> is 41%.
- m. Marked down by 0.5 as in 3 out of 6 trials (half the trials) the CIs cross 1, however, the CI of the pooled estimate does not cross 1.
- n. Marked down 0.5 points as the point estimates range from 0.64 to 1.24 and the I<sup>2</sup> is 57.5%
- o. Marked down by 1 point because in 3 out of 4 trials (three quarters of the trials) the CIs cross 1, as does the pooled estimate.
- p. Marked down by 0.5 points as three of the trials were stopped early and there were 'some concerns' regarding two trials on ROB2 (4D and ASPEN).

q. Marked down by 0.5 points as the point estimates for the trials ranged from 0.52 to 1.17 and the  $I^2$  is 49.1%.  
 r. Marked down by 0.5 points as in 12 out of 18 trials (two thirds of the trials) the confidence intervals cross 1, however, the CI of the pooled estimate does not cross 1.

### Supplementary Figure e4: Meta-analysis of relative effects of treatment on all-cause mortality, all trials

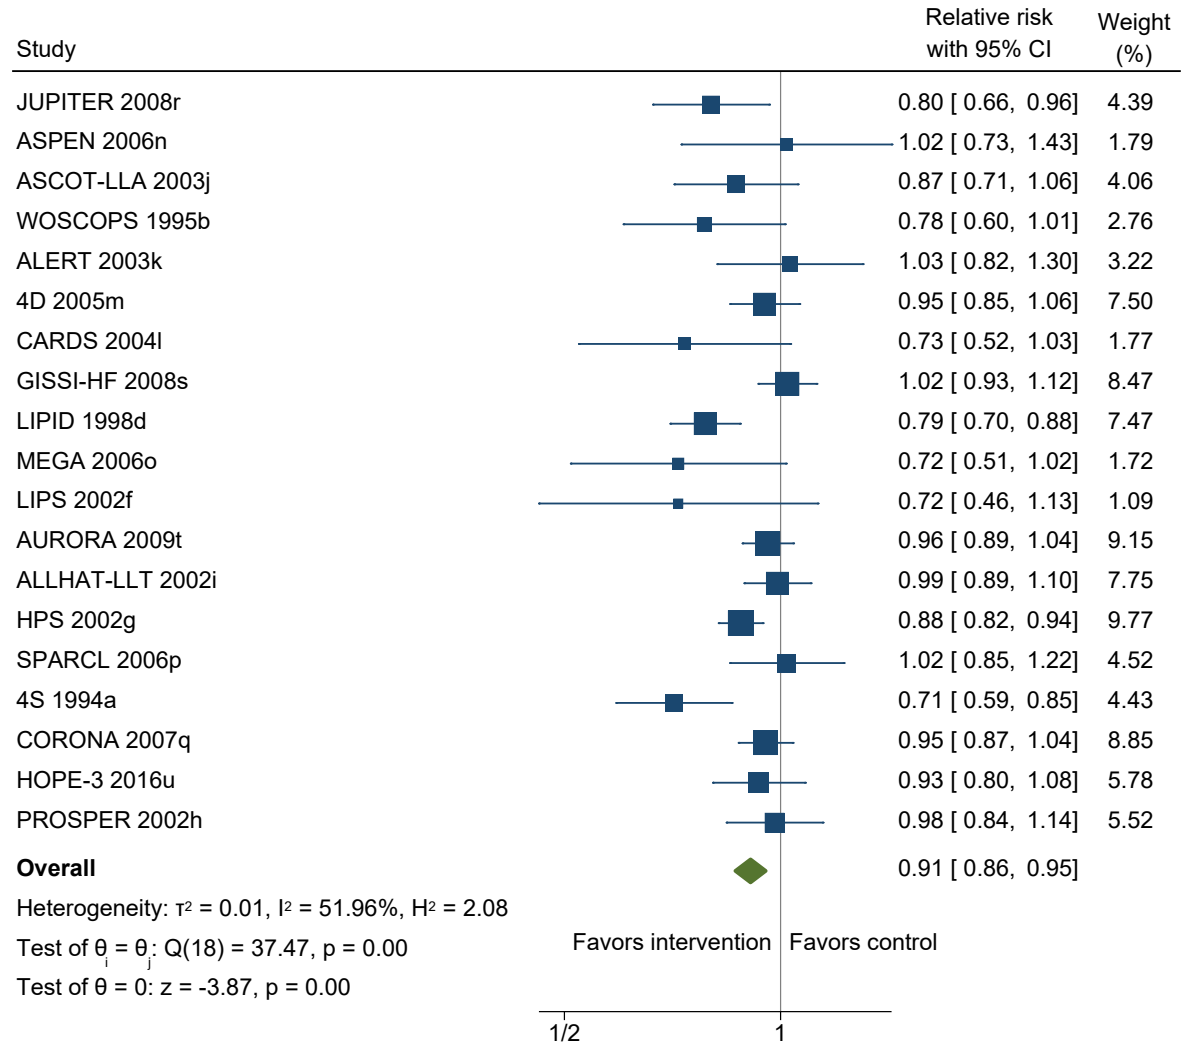

Random-effects DerSimonian-Laird model

Supplementary Figure e5: Meta-analysis of absolute effects of treatment on all-cause mortality, all trials

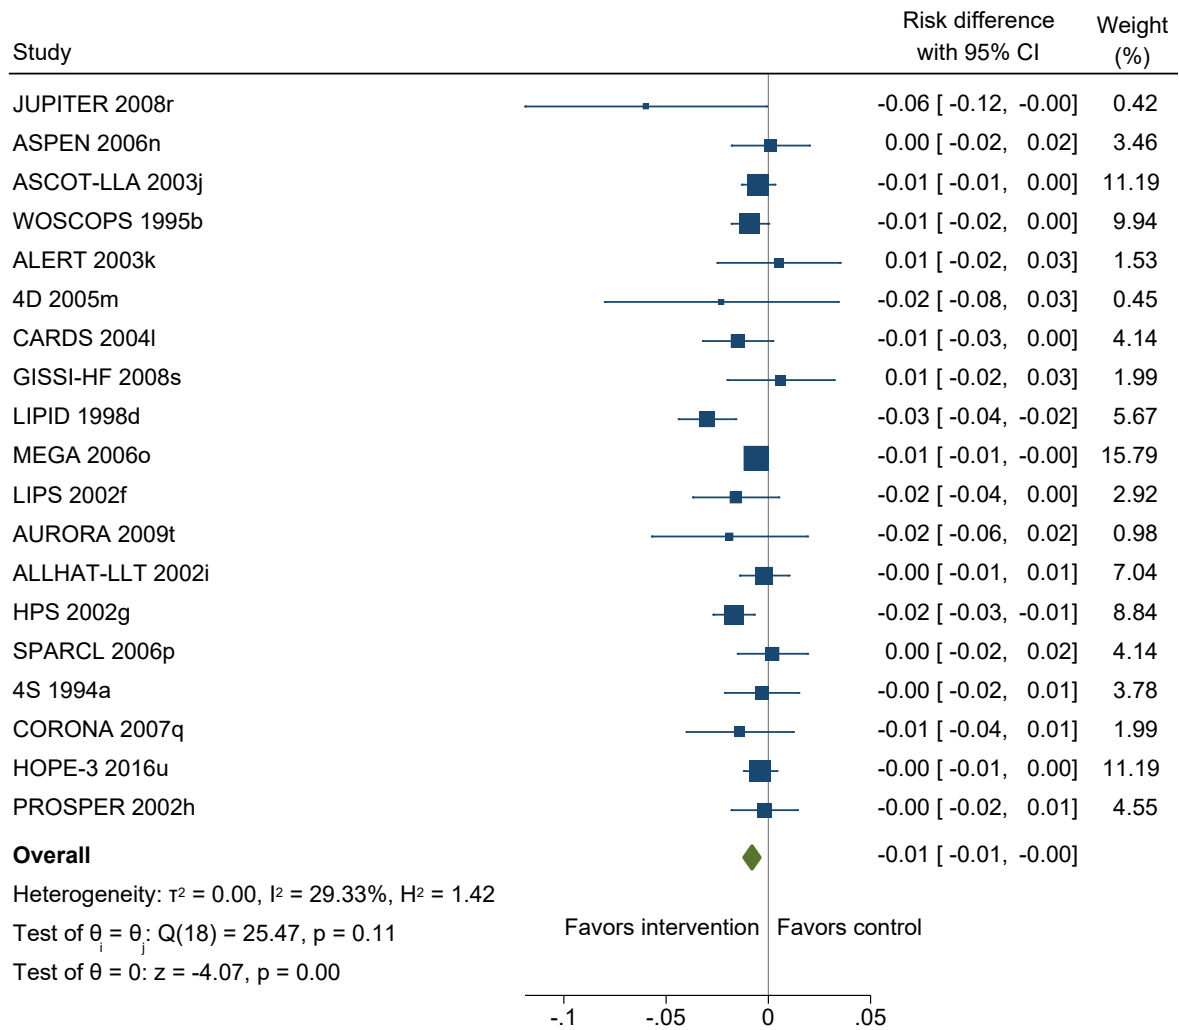

Random-effects DerSimonian-Laird model

Supplementary Figure e6: Meta-analysis of relative effects of treatment on myocardial infarction, all trials

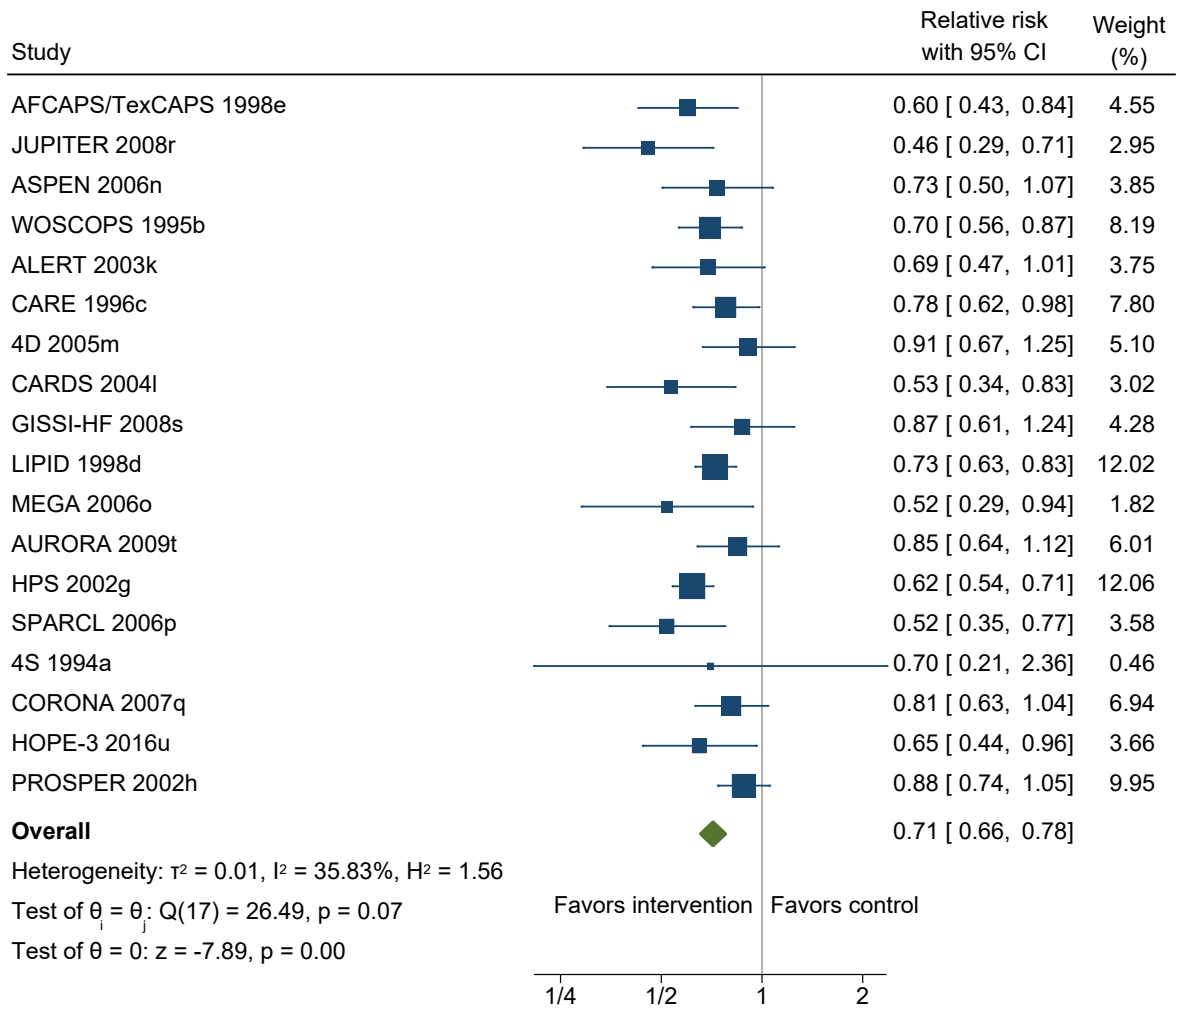

Random-effects DerSimonian-Laird model

Supplementary Figure e7: Meta-analysis of absolute effects of treatment on myocardial infarction, all trials

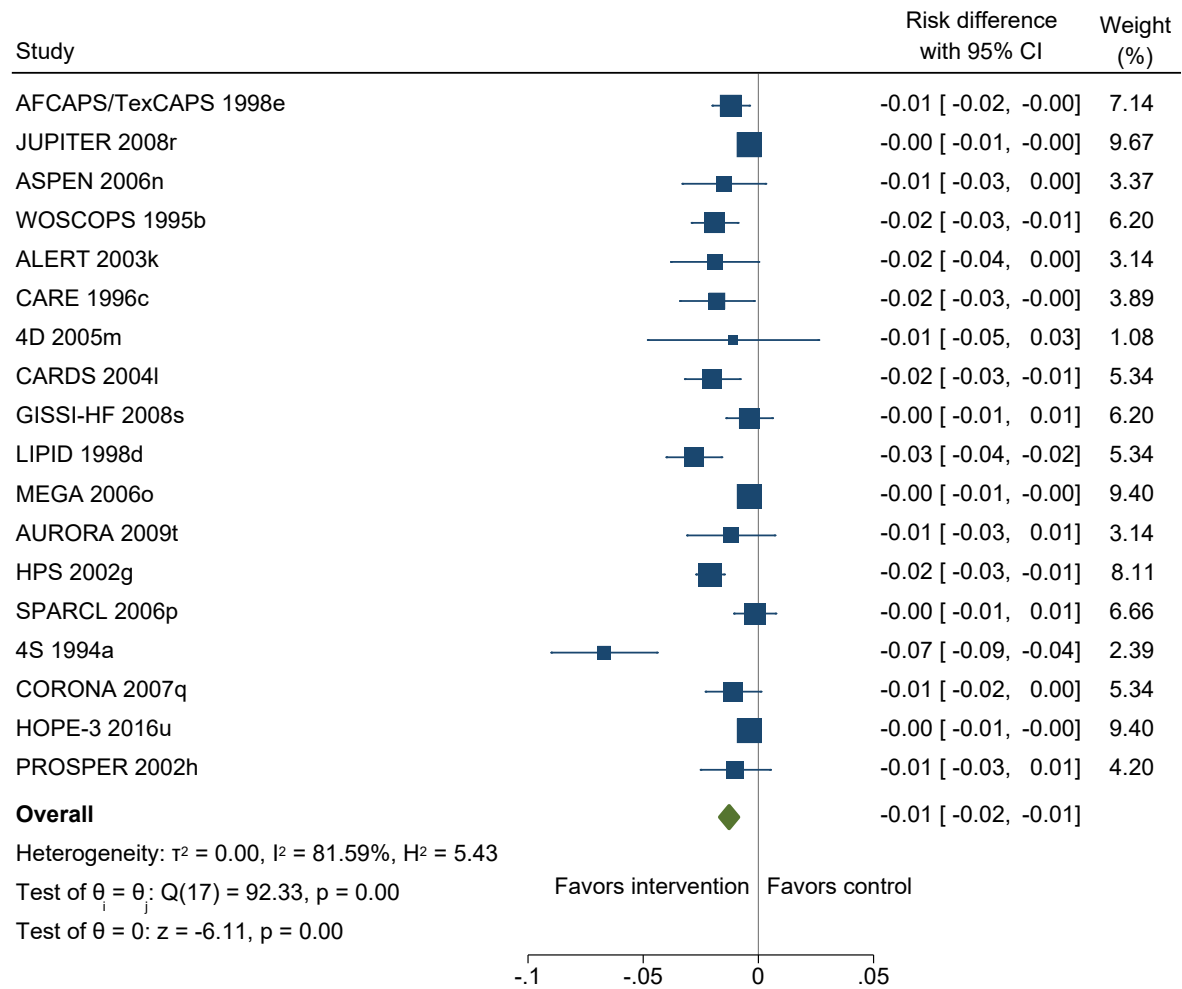

Random-effects DerSimonian-Laird model



Supplementary Figure e8: Meta-analysis of relative effects of treatment on stroke, all trials

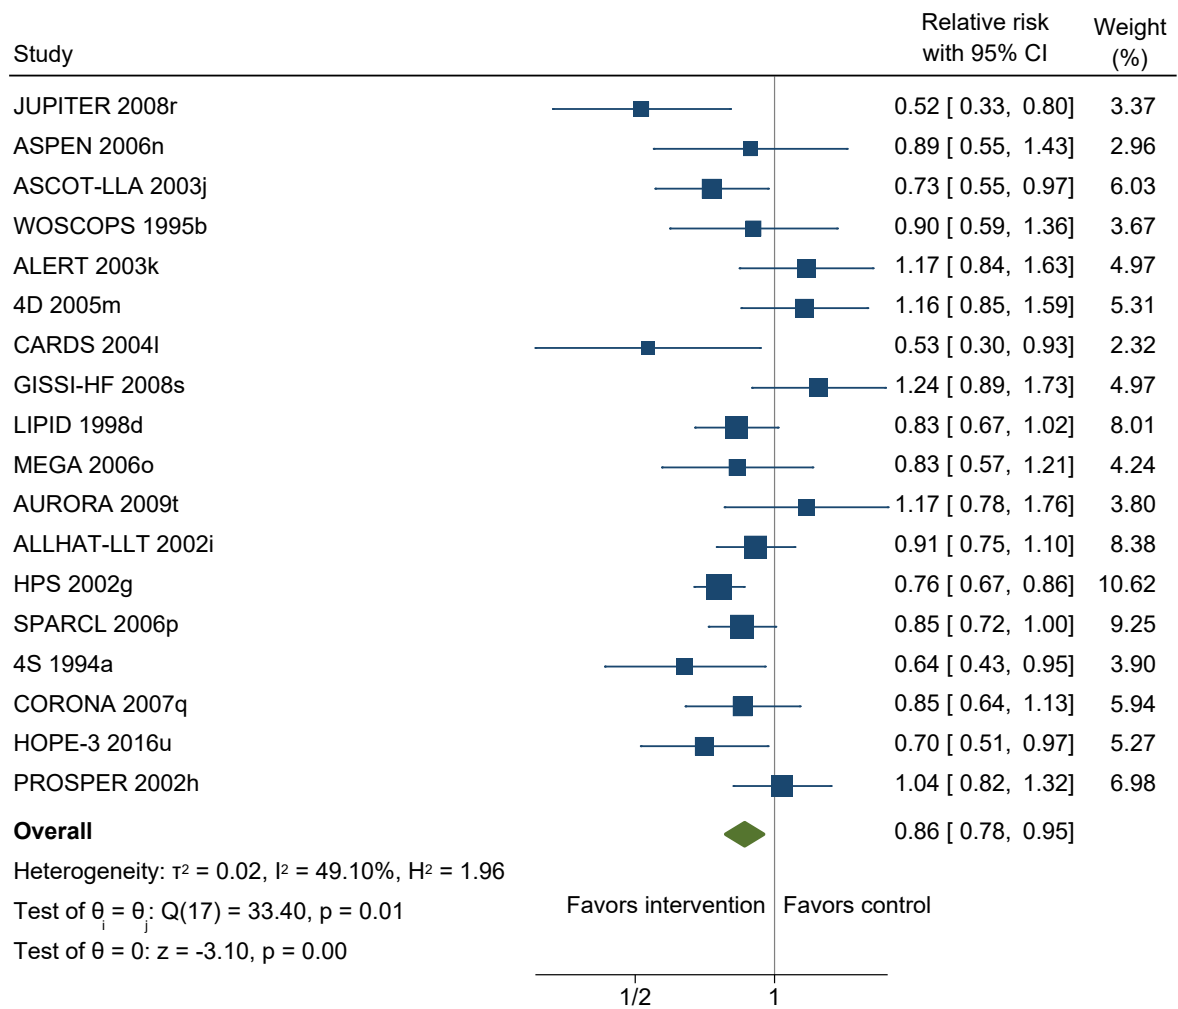

Random-effects DerSimonian-Laird model

Supplementary Figure e9: Meta-analysis of absolute effects of treatment on stroke, all trials

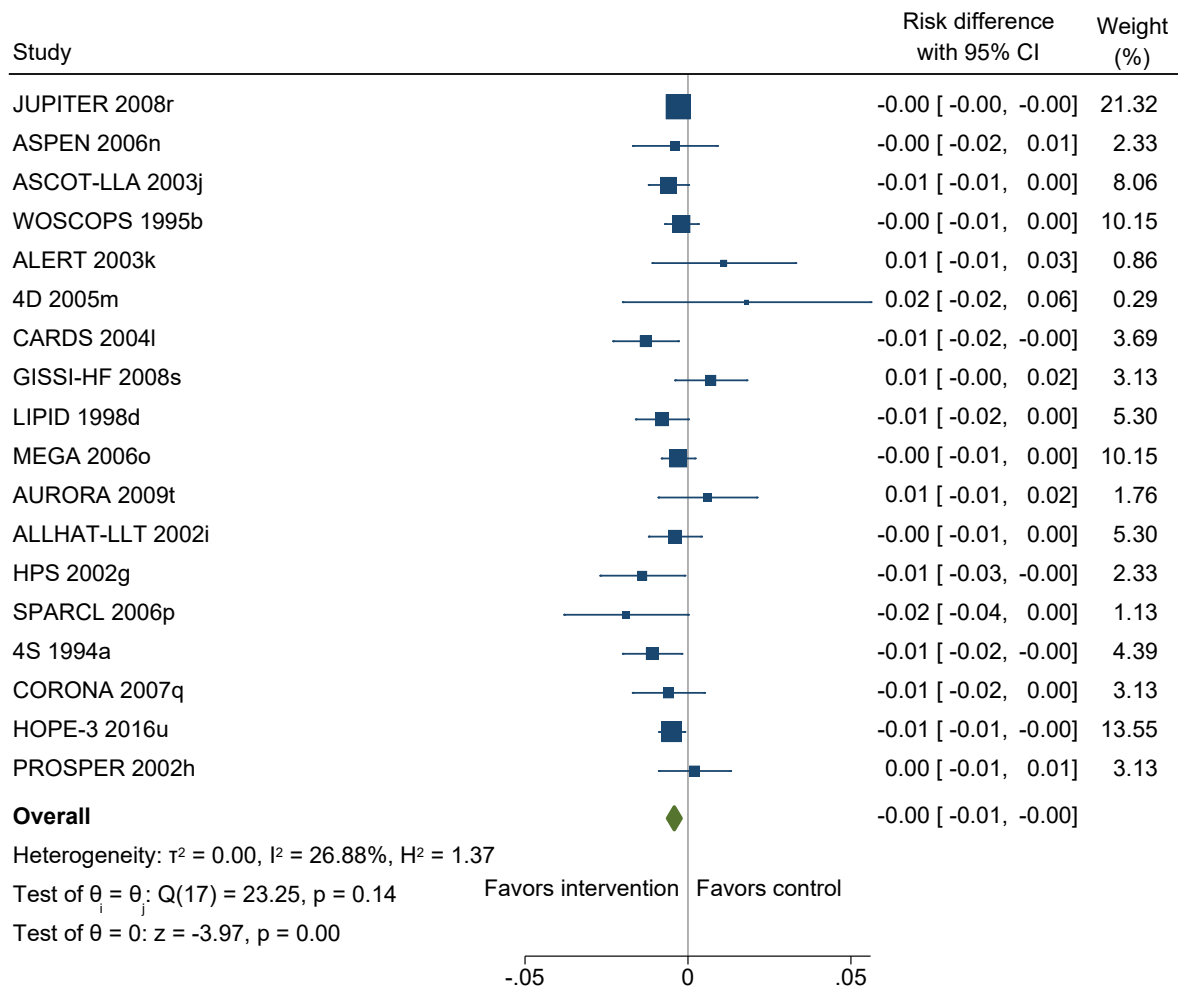

Random-effects DerSimonian-Laird model

Supplementary Figure e10: Meta-analysis of relative effects of treatment on all-cause mortality in primary and secondary prevention trials

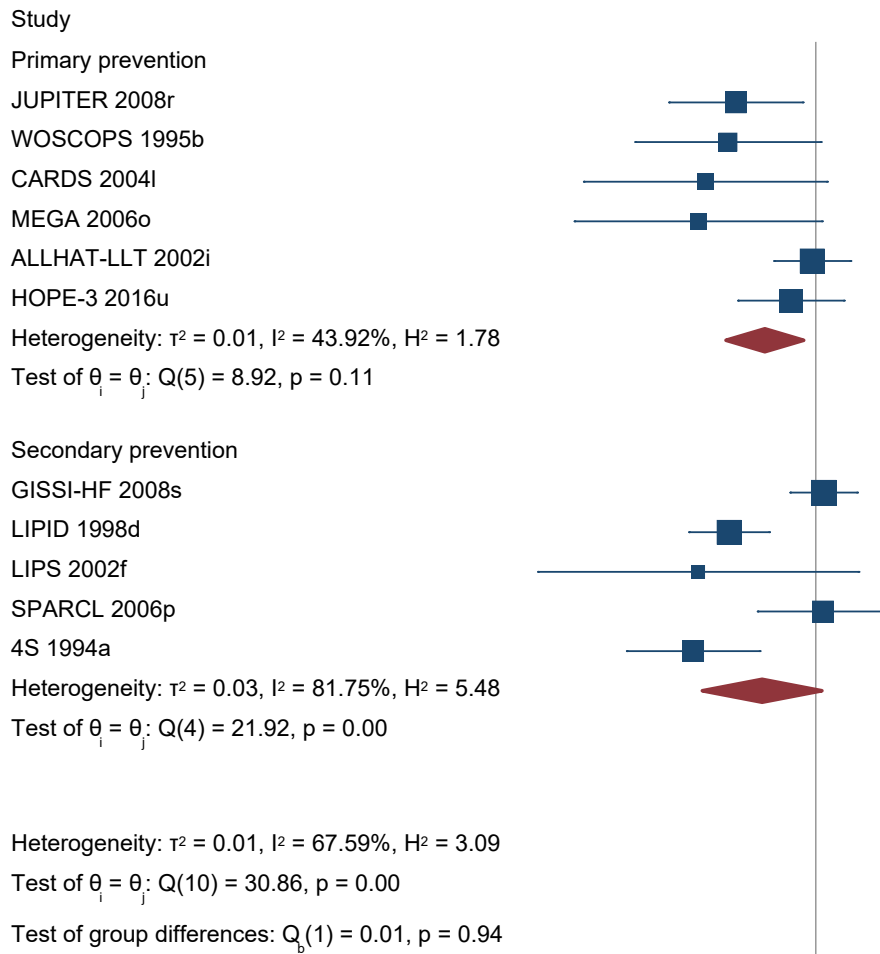

Supplementary Figure e11: Meta-analysis of absolute effects of treatment on all-cause mortality in primary and secondary prevention trials

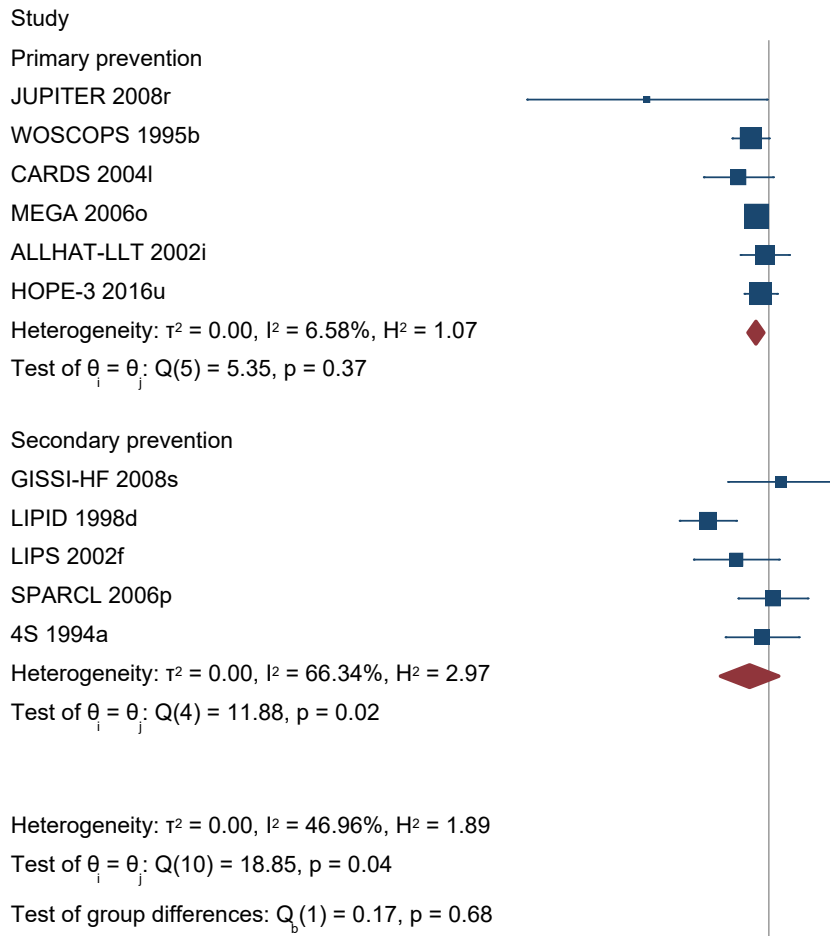

Supplementary Figure e12: Meta-analysis of relative effects of treatment on myocardial infarction in primary and secondary prevention trials

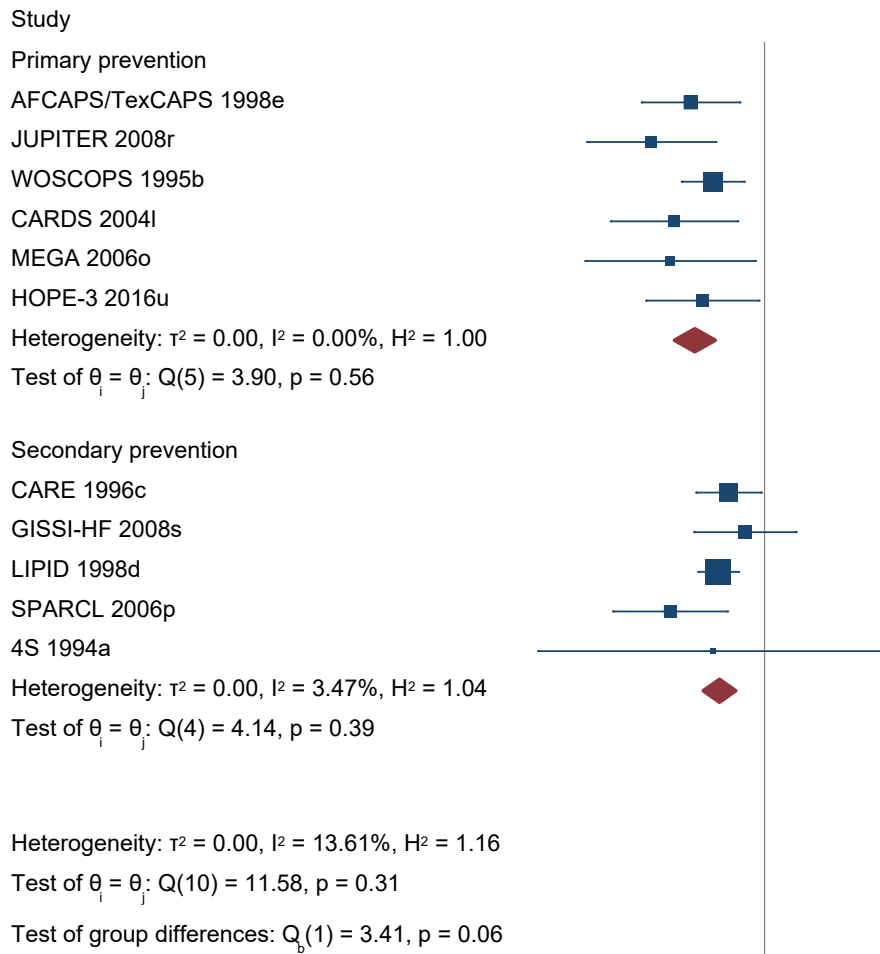

Supplementary Figure e13: Meta-analysis of absolute effects of treatment on myocardial infarction in primary and secondary prevention trials

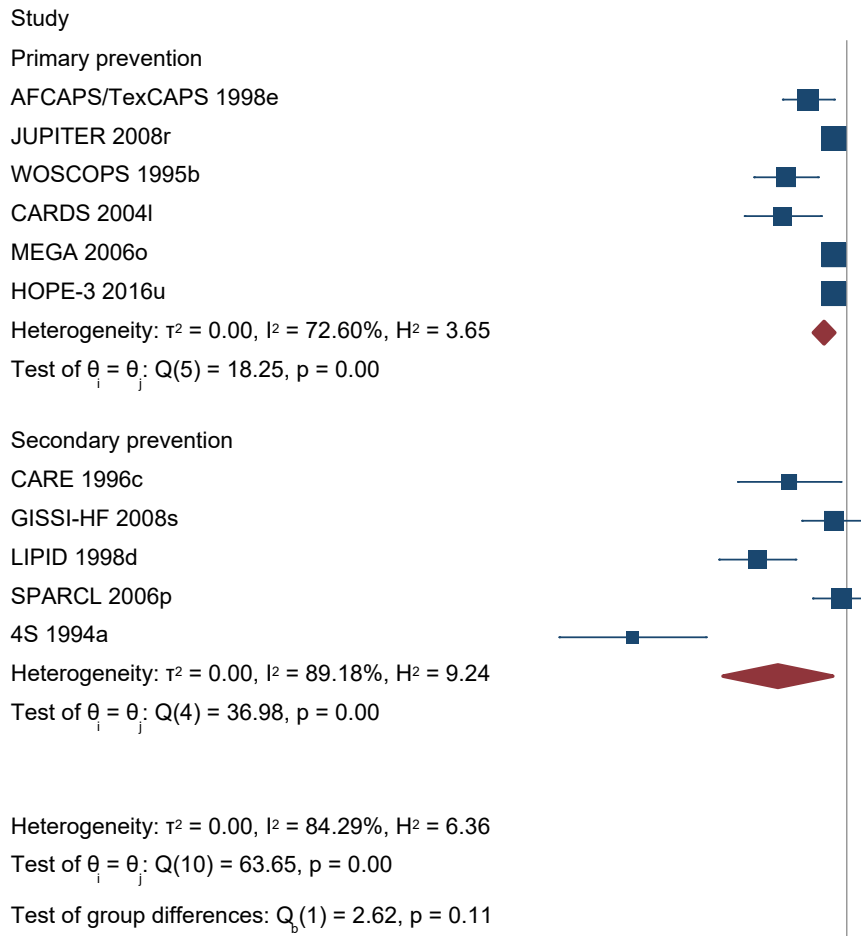

Supplementary Figure e14: Meta-analysis of relative effects of treatment on stroke from primary and secondary prevention trials

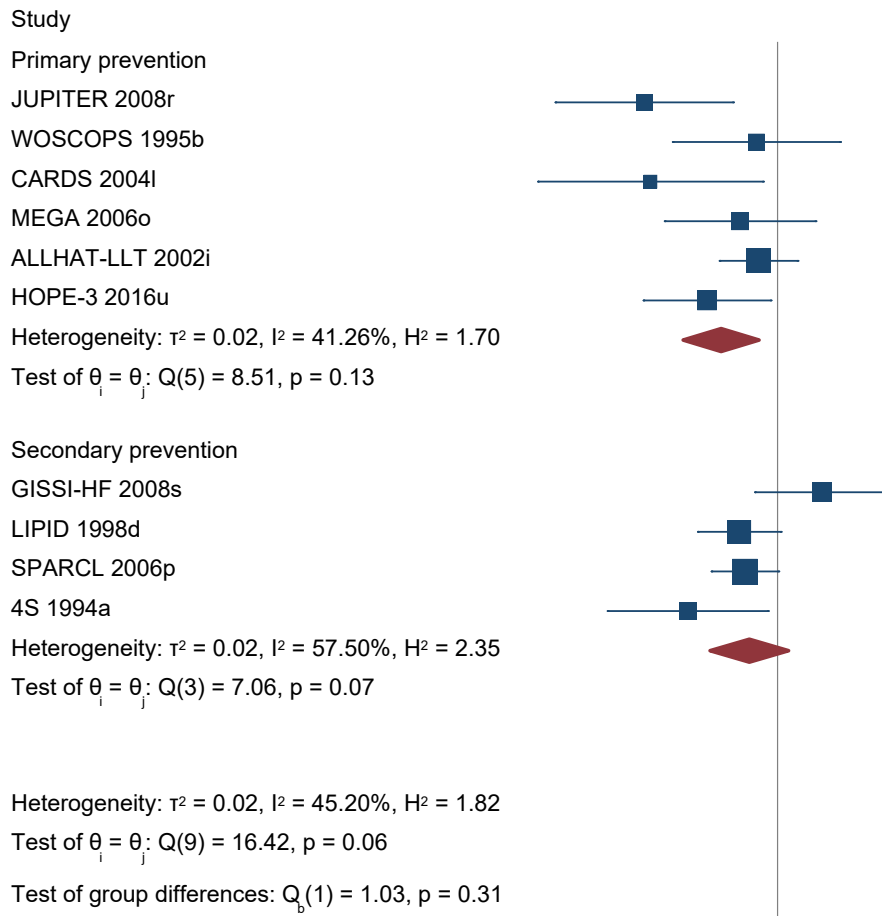

Supplementary Figure e15: Meta-analysis of absolute effects of treatment on stroke in primary and secondary prevention trials

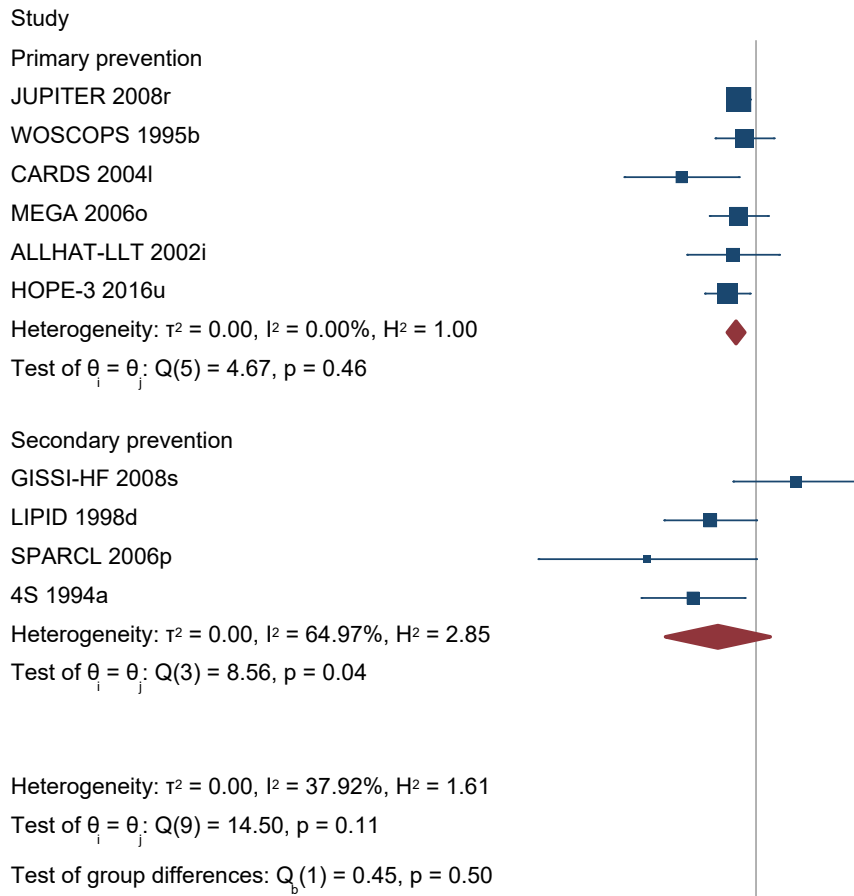



Supplementary Table e4: Meta-regression results of outcomes by mean difference in LDL-C (unadjusted)

| Outcome         | Number of trials | Coefficient | 95% CI        | p-value | R <sup>2</sup> |
|-----------------|------------------|-------------|---------------|---------|----------------|
| All death logRR | 19               | -0.12       | -0.28, 0.03   | 0.11    | 14%            |
| All death ARD   | 19               | -0.004      | -0.019, 0.01  | 0.54    | 0%             |
| MI logRR        | 18               | -0.19       | -0.61, 0.23   | 0.35    | 0%             |
| MI ARD          | 18               | -0.014      | -0.036, 0.008 | 0.19    | 0%             |
| Stroke logRR    | 18               | -0.26       | -0.58, 0.05   | 0.098   | 4%             |
| Stroke ARD      | 18               | -0.004      | -0.011, 0.003 | 0.24    | 0%             |

logRR = log relative risk; ARD = absolute risk difference; coefficient = estimate of slope in meta-regression model; R<sup>2</sup> = proportion of between-study variance explained by mean difference in LDL-C; R<sup>2</sup> values of zero imply that the mediator variable explains none of the observed heterogeneity
